# Supplementary material for: Integrative Diffusion-Weighted Imaging and Radiogenomic Network Analysis of Glioblastoma multiforme
Source: PubMed Central journal article supplement (PMC5339871; doi:10.1038/srep43523), 2017-03-07
Supplement: srep43523-s1.pdf [file srep43523-s1.pdf]

# **Integrative Diffusion-Weighted Imaging and Radiogenomic Network Analysis of Glioblastoma multiforme (Supplementary)**

Dieter Henrik Heiland<sup>1</sup>, Carl Philipp Simon-Gabriel<sup>2</sup>, Theo Demerath<sup>2,6</sup>, Gerrit Haaker<sup>1</sup>, Dietmar Pfeifer<sup>3</sup>, Elias Kellner<sup>4</sup>, Valerij G. Kiselev<sup>4</sup>, Ori Staszewski<sup>5</sup>, Horst Urbach<sup>2</sup>, Astrid Weyerbrock<sup>1</sup>, Irina Mader<sup>2</sup>

<sup>1</sup>*Department of Neurosurgery, Medical Center - University of Freiburg, Faculty of Medicine, University of Freiburg, Germany*

<sup>2</sup>*Department of Neuroradiology, Medical Center - University of Freiburg, Faculty of Medicine, University of Freiburg, Germany*

<sup>3</sup>*Department of Hematology, Oncology and Stem Cell Transplantation, Medical Center - University of Freiburg, Faculty of Medicine, University of Freiburg, Germany*

<sup>4</sup>*Medical Physics, Department of Radiology, Medical Center - University of Freiburg, Faculty of Medicine, University of Freiburg, Germany*

<sup>5</sup>*Department of Neuropathology; Medical Center - University of Freiburg, Faculty of Medicine, University of Freiburg, Germany*

<sup>6</sup>*Department of Radiology, University of Basel, Basel, Switzerland*

Corresponding author:  
Dieter Henrik Heiland  
Department of Neurosurgery  
Medical Center - University of Freiburg  
Faculty of Medicine, University of Freiburg  
Breisacher Strasse 64  
D-79106 Freiburg  
-Germany-  
Tel: +49 (0) 761 270 50010  
Fax: +49 (0) 761 270 51020  
E-mail: dieter.henrik.heiland@uniklinik-freiburg.de

# Supplementary

## Methods

### Preparing Expression Data

RNA was prepared using the RNAeasy kit (Qiagen). An amount of 1.5 µg RNA was obtained for expression arrays analysis. Arrays were performed by human genome 2.0 chip (Affymetrix). Raw data were processed, normalised (Robust Multi-array Average (RMA)) and controlled by R software and the Affymetrix R-package.

### Correlation Analysis of Gene Expression and DWI Parameter

Correlation of each DWI parameter and expression data was performed by pairwise spearman correlation of each gene and DWI parameter. Significance was tested by Fischer's Exact test and adjusted for multiples testing by Bejamini Hochberger<sup>3</sup>. In a next step, significant correlated genes ( $p < 0.05$ ) were analysed by an unsupervised hierarchical clustering (Figure 3A, 4A). For a detailed analysis of molecular functions and pathway activation, we added a network-based analysis.

### Weighted Gene Co-Expression Network Analysis (WGCNA)

The WGCNA is a tool first described by Steve Horvath and Peter Langfelder<sup>18</sup>. It is a powerful and robust tool to analyse preselected gene sets and find correlated biological functions or related pathways to specific clinical traits. In our case, we integrated our DWI parameter as input for this analysis. The WGCNA tool is available on the bioconductor database and processed in R-software. All expression data were used as input for WGCNA analysis. In a first step, outliers in the expression dataset were identified by a normalised connectivity below the threshold of -2.5. All samples identified as outliers were excluded from further analysis; no outlier was identified in our dataset.

*The following R-code was used:*

```
A=adjacency(t(datExpr),type="distance")
```

```
k=as.numeric(apply(A,2,sum))-1
```

```
Z.k=scale(k)
```

```
thresholdZ.k=-2.5
```

In a next step, further analysis was performed as signed network analysis with a soft threshold (power  $\beta$ ) based on scale-free topology criteria. We tested different  $\beta$ -values by following r-function.

*The following R-code was used:*

```
powers=c(1:20)
```

```
sft=pickSoftThreshold(datExpr,powerVector=powers, networkType = "unsigned")
```

### Calculation of SFT:

$$R_{SFT} = |cor(\log(freq_{KN}), \log(KN))| > 0.9$$

If the correlation between the logarithm of connectivity (KN) and frequency of connectivity ( $freq_{KN}$ ) achieved values above 0.9, we assume that SFT criteria are adhered. The calculated power was implemented in the WGCNA analysis. In addition, dynamic tree cutting was used as described by Peter Langfelder<sup>14</sup> with a deep split of two.

### Characterising of Expression Modules

Given modules as presented in Figure 3B and 4B with a significant positive correlation to each module eigengene were used for further validation. Additionally, another parameter was used for validation: The “intramodule connectivity (kME)”. kME ranked all genes in a module by its “importance” (connectivity) and was correlated to DWI parameters (Figure 3C, 4C).

*The following R-code was used:*

```
datKME=signedKME(datExpr, ME)
```

In a next step, gene set enrichment analysis investigated pathway functions and biological background of each expression module. Permutation based gene set enrichment analysis (GSEA) was performed

for correlated module to find specifically enriched biological functions and related pathways<sup>2</sup>. Pre-ranked GSEA were performed with 1000 permutations. P-values were calculated by familywise error rate (FWER) which is a robust method for multiples testing<sup>3</sup>. The Molecular Signatures Database version 5.0 was used including pathways gene sets (C2) (<http://www.broadinstitute.org/gsea>) as input databases for this analysis. GSEA plots were visualised by limma R-package (barcodeplot function). All genesets (C2 all) were tested without pre-analytic sorting out specific genesets (Figure 3D and 4E).

#### References:

1. Langfelder, P. & Horvath, S. WGCNA: an R package for weighted correlation network analysis. *BMC Bioinformatics* **9**, 559 (2008).
2. Subramanian, A. *et al.* Gene set enrichment analysis: a knowledge-based approach for interpreting genome-wide expression profiles. *Proc. Natl. Acad. Sci. U. S. A.* **102**, 15545–50 (2005).
3. Benjamini, Y. & Hochberg, Y. Controlling the false discovery rate: a practical and powerful approach to multiple testing. *Journal of the Royal Statistical Society* **57**, 289–300 (1995).

## Tables:

### Supplementary Table S1

| Patient     | Overall Survival | PFS    | IDH1-Mutation  | Radial Diffusivity [x 10 <sup>-6</sup> mm <sup>2</sup> /s] | Axial Diffusivity [x 10 <sup>-6</sup> mm <sup>2</sup> /s] | Mean Diffusivity [x 10 <sup>-6</sup> mm <sup>2</sup> /s] | Fractional Anisotropy [dimensionless] | Expression Subgroup |
|-------------|------------------|--------|----------------|------------------------------------------------------------|-----------------------------------------------------------|----------------------------------------------------------|---------------------------------------|---------------------|
| Pat_GBM_1   | alive            | 33.84  | wildtype       | 0.81                                                       | 1.09                                                      | 0.9                                                      | 0.22                                  | Mesenchymal         |
| Pat_GBM_2   | 1.64             | 1.25   | wildtype       | 0.77                                                       | 1.11                                                      | 0.87                                                     | 0.21                                  | Mesenchymal         |
| Pat_GBM_3   | alive            | no PFS | wildtype       | 0.91                                                       | 1.24                                                      | 1.01                                                     | 0.19                                  | Proneural           |
| Pat_GBM_4   | 11.34            | 2.97   | wildtype       | 0.98                                                       | 1.27                                                      | 1.07                                                     | 0.18                                  | Mesenchymal         |
| Pat_GBM_5   | 16.1             | 8.36   | wildtype       | 0.87                                                       | 1.15                                                      | 0.96                                                     | 0.18                                  | Mesenchymal         |
| Pat_GBM_6   | 3.72             | 3.72   | R132H Mutation | 0.94                                                       | 1.2                                                       | 1.03                                                     | 0.17                                  | Proneural           |
| Pat_GBM_7   | 3.72             | 3.72   | wildtype       | 0.94                                                       | 1.2                                                       | 1.03                                                     | 0.17                                  | Mesenchymal         |
| Pat_GBM_8   | 11.67            | 9.15   | wildtype       | 0.88                                                       | 1                                                         | 0.94                                                     | 0.16                                  | Neural              |
| Pat_GBM_9   | 6.2              | 3.84   | wildtype       | 0.93                                                       | 1.19                                                      | 1.01                                                     | 0.15                                  | Mesenchymal         |
| Pat_GBM_1_0 | 12.36            | 12.36  | wildtype       | 1.06                                                       | 1.42                                                      | 1.18                                                     | 0.15                                  | Proneural           |
| Pat_GBM_1_1 | 1.77             | 1.77   | wildtype       | 1.09                                                       | 1.37                                                      | 1.19                                                     | 0.15                                  | Classic             |
| Pat_GBM_1_2 | 1.44             | 1.41   | wildtype       | 0.92                                                       | 1.12                                                      | 0.99                                                     | 0.15                                  | Proneural           |
| Pat_GBM_1_3 | 22.34            | 13.03  | wildtype       | 1.05                                                       | 1.28                                                      | 1.12                                                     | 0.14                                  | Proneural           |
| Pat_GBM_1_4 | alive            | no PFS | wildtype       | 1.13                                                       | 1.36                                                      | 1.21                                                     | 0.13                                  | Classic             |
| Pat_GBM_1_5 | alive            | no PFS | R132H Mutation | 1.21                                                       | 1.45                                                      | 1.29                                                     | 0.12                                  | Proneural           |
| Pat_GBM_1_6 | 24.2             | 12     | wildtype       | 1.07                                                       | 1.29                                                      | 1.14                                                     | 0.11                                  | Proneural           |
| Pat_GBM_1_7 | 21.21            | 7.43   | wildtype       | 1.07                                                       | 1.28                                                      | 1.14                                                     | 0.11                                  | Mesenchymal         |
| Pat_GBM_1_8 | 9.57             | 7.87   | wildtype       | 1.15                                                       | 1.35                                                      | 1.22                                                     | 0.1                                   | Proneural           |
| Pat_GBM_1_9 | 3.73             | 3.73   | wildtype       | 1.04                                                       | 1.21                                                      | 1.09                                                     | 0.09                                  | Proneural           |
| Pat_GBM_2_0 | alive            | 15.3   | R132H Mutation | 1.32                                                       | 1.5                                                       | 1.37                                                     | 0.08                                  | Proneural           |
| Pat_GBM_2_1 | 17.04            | 10.82  | wildtype       | 2.25                                                       | 2.42                                                      | 2.3                                                      | 0.04                                  | Proneural           |

## Supplementary Table S2

| <b>modTrait</b>  | <b>AD</b>    | <b>RD</b>    | <b>MD</b>    | <b>FA</b>    |
|------------------|--------------|--------------|--------------|--------------|
| MEsteelblue      | -0.531541206 | -0.645146415 | -0.604735109 | 0.727126769  |
| MEmidnightblue   | -0.357348538 | -0.51161527  | -0.470806766 | 0.576809068  |
| MEgreenyellow    | -0.349503233 | -0.469404123 | -0.423309201 | 0.549853878  |
| MEsalmon         | -0.229927999 | -0.385365215 | -0.326761407 | 0.528940712  |
| MEplum1          | -0.279401992 | -0.336852385 | -0.302050905 | 0.525202026  |
| MEpurple         | -0.544690469 | -0.614902831 | -0.609742273 | 0.499355525  |
| MEpink           | -0.226581017 | -0.383781685 | -0.330771084 | 0.483882738  |
| MEdarkgreen      | -0.303326611 | -0.368192959 | -0.35021039  | 0.47746196   |
| MEroyalblue      | -0.063497438 | -0.2573752   | -0.205058281 | 0.457145796  |
| MElightyellow    | -0.151966298 | -0.30078578  | -0.254773662 | 0.438947732  |
| MEsaddlebrown    | -0.217589344 | -0.28574029  | -0.247170399 | 0.405013402  |
| MEdarkred        | -0.232782189 | -0.311886369 | -0.29252715  | 0.391175444  |
| MEgreen          | -0.587795817 | -0.537589231 | -0.548703971 | 0.384622197  |
| MElightgreen     | -0.414748532 | -0.428370816 | -0.438079988 | 0.357398364  |
| MEgrey           | -0.14807133  | -0.273094241 | -0.252928302 | 0.342221151  |
| MEblack          | -0.510269116 | -0.467409232 | -0.485074935 | 0.33369956   |
| MEgrey60         | -0.251605764 | -0.317031375 | -0.286417922 | 0.327763714  |
| MEred            | -0.261158696 | -0.306089356 | -0.294593158 | 0.318477905  |
| MEwhite          | 0.130506479  | -0.044451656 | 0.000568281  | 0.303064511  |
| MEyellowgreen    | 0.141229496  | -0.106725639 | -0.045692698 | 0.238412545  |
| MEdarkturquoise  | 0.107945948  | -0.050498487 | -0.012470312 | 0.23013308   |
| MEdarkorange     | 0.279163842  | 0.113123647  | 0.164715574  | 0.159045434  |
| MEmagenta        | 0.007186125  | -0.021836781 | -0.003966607 | 0.081571107  |
| MEdarkmagenta    | 0.100663044  | 0.045643136  | 0.043197178  | 0.04400239   |
| MEbrown          | -0.394002218 | -0.264667338 | -0.307470189 | 0.004193201  |
| MEpaleturquoise  | 0.231093962  | 0.23609991   | 0.257419196  | -0.027690469 |
| MEskyblue        | -0.19044115  | -0.091687954 | -0.113321703 | -0.080759733 |
| MEviolet         | -0.125527315 | -0.016128546 | -0.06296557  | -0.169650636 |
| MEdarkolivegreen | -0.031867578 | 0.101750095  | 0.050842138  | -0.213031789 |
| MEskyblue3       | -0.009904185 | 0.091608751  | 0.060659604  | -0.227067426 |
| MEsienna3        | 0.323118174  | 0.329730304  | 0.326901809  | -0.338400971 |
| MEorangered4     | 0.287260246  | 0.368184276  | 0.352684921  | -0.38214814  |
| MEturquoise      | 0.145093013  | 0.242054441  | 0.220905933  | -0.388150283 |

|             |             |             |             |              |
|-------------|-------------|-------------|-------------|--------------|
| MElightcyan | 0.297284352 | 0.384880132 | 0.368161252 | -0.394188304 |
| MEorange    | 0.590853223 | 0.61353054  | 0.620728934 | -0.398525104 |
| MEblue      | 0.540380875 | 0.55778475  | 0.555976295 | -0.417257671 |
| MEdarkgrey  | 0.476831115 | 0.531144731 | 0.527997006 | -0.442687688 |
| MEtan       | 0.409621375 | 0.519702111 | 0.484963768 | -0.52455476  |
| MEyellow    | 0.329679459 | 0.46877193  | 0.418572637 | -0.58002453  |
| MEcyan      | 0.498212658 | 0.636474975 | 0.591295495 | -0.73580725  |

## Supplementary Table S3

### Expression Module 1

| Pathway                                                |                                                        |             |      |            |           |             |           |            |
|--------------------------------------------------------|--------------------------------------------------------|-------------|------|------------|-----------|-------------|-----------|------------|
| NAME                                                   | GS<br> follow link to MSigDB                           | GS DETAILS  | SIZE | ES         | NES       | NOM p-val   | FDR q-val | FWER p-val |
| HALLMARK_EPITHELIAL_MESENCHYMAL_TRANSITION             | HALLMARK_EPITHELIAL_MESENCHYMAL_TRANSITION             | Details ... | 119  | 0.55629694 | 2.8440008 | 0           | 0         | 0          |
| HALLMARK_TNFA_SIGNALING_VIA_NFKB                       | HALLMARK_TNFA_SIGNALING_VIA_NFKB                       | Details ... | 120  | 0.52101225 | 2.6372828 | 0           | 0         | 0          |
| HALLMARK_IL6_JAK_STAT3_SIGNALING                       | HALLMARK_IL6_JAK_STAT3_SIGNALING                       | Details ... | 51   | 0.53889894 | 2.4437075 | 0           | 0         | 0          |
| HALLMARK_INTERFERON_GAMMA_RESPONSE                     | HALLMARK_INTERFERON_GAMMA_RESPONSE                     | Details ... | 102  | 0.4839161  | 2.413515  | 0           | 0         | 0          |
| HALLMARK_INFLAMMATORY_RESPONSE                         | HALLMARK_INFLAMMATORY_RESPONSE                         | Details ... | 116  | 0.47081843 | 2.3945246 | 0           | 0         | 0          |
| HALLMARK_COAGULATION                                   | HALLMARK_COAGULATION                                   | Details ... | 76   | 0.49070486 | 2.3592656 | 0           | 0         | 0          |
| HALLMARK_APOPTOSIS                                     | HALLMARK_APOPTOSIS                                     | Details ... | 101  | 0.44845754 | 2.2582138 | 0           | 0         | 0          |
| HALLMARK_COMPLEMENT_ACTIVATION                         | HALLMARK_COMPLEMENT                                    | Details ... | 122  | 0.43771365 | 2.2548144 | 0           | 0         | 0          |
| HALLMARK_IL2_STAT5_SIGNALING                           | HALLMARK_IL2_STAT5_SIGNALING                           | Details ... | 107  | 0.4434922  | 2.234242  | 0           | 0         | 0          |
| HALLMARK_HYPOXIA                                       | HALLMARK_HYPOXIA                                       | Details ... | 111  | 0.44082114 | 2.2304697 | 0           | 0         | 0          |
| HALLMARK_PROTEIN_SECRETION                             | HALLMARK_PROTEIN_SECRETION                             | Details ... | 57   | 0.43549153 | 2.0029528 | 0           | 2.56E-04  | 0.003      |
| HALLMARK_GLYCOLYSIS                                    | HALLMARK_GLYCOLYSIS                                    | Details ... | 100  | 0.39919165 | 1.9832736 | 0           | 3.93E-04  | 0.005      |
| HALLMARK_INTERFERON_ALPHA_RESPONSE                     | HALLMARK_INTERFERON_ALPHA_RESPONSE                     | Details ... | 44   | 0.4466719  | 1.9516271 | 0.001011122 | 5.08E-04  | 0.007      |
| HALLMARK_REACTIVE_OXYGEN_SPECIES_PATHWAY               | HALLMARK_REACTIVE_OXYGEN_SPECIES_PATHWAY               | Details ... | 34   | 0.45772335 | 1.9411477 | 0           | 4.71E-04  | 0.007      |
| HALLMARK_ALLOGRAFT_REJECTION                           | HALLMARK_ALLOGRAFT_REJECTION                           | Details ... | 117  | 0.3778858  | 1.8965789 | 0           | 8.20E-04  | 0.013      |
| HALLMARK_KRAS_SIGNALING_UP                             | HALLMARK_KRAS_SIGNALING_UP                             | Details ... | 115  | 0.37339664 | 1.8736395 | 0           | 0.0010071 | 0.017      |
| HALLMARK_MTORC1_SIGNALING                              | HALLMARK_MTORC1_SIGNALING                              | Details ... | 112  | 0.3639201  | 1.8387457 | 0           | 0.0014559 | 0.026      |
| HALLMARK_UNFOLDED_PROTEIN_RESPONSE                     | HALLMARK_UNFOLDED_PROTEIN_RESPONSE                     | Details ... | 51   | 0.40231565 | 1.8295085 | 0.001006036 | 0.0014816 | 0.028      |
| HALLMARK_P53_PATHWAY                                   | HALLMARK_P53_PATHWAY                                   | Details ... | 92   | 0.36283466 | 1.7855086 | 0           | 0.0022529 | 0.045      |
| <b>Ontology</b>                                        |                                                        |             |      |            |           |             |           |            |
| NAME                                                   | GS<br> follow link to MSigDB                           | GS DETAILS  | SIZE | ES         | NES       | NOM p-val   | FDR q-val | FWER p-val |
| REGULATION_OF_I_KAPPA_KINASE_NF_KAPPA_CASCADE          | REGULATION_OF_I_KAPPA_KINASE_NF_KAPPA_CASCADE          | Details ... | 44   | 0.5697531  | 2.5787356 | 0           | 0         | 0          |
| I_KAPPA_KINASE_NF_KAPPA_CASCADE                        | I_KAPPA_KINASE_NF_KAPPA_CASCADE                        | Details ... | 57   | 0.5507106  | 2.5333748 | 0           | 0         | 0          |
| POSITIVE_REGULATION_OF_I_KAPPA_KINASE_NF_KAPPA_CASCADE | POSITIVE_REGULATION_OF_I_KAPPA_KINASE_NF_KAPPA_CASCADE | Details ... | 43   | 0.5635465  | 2.485007  | 0           | 0         | 0          |
| POSITIVE_REGULATION_OF_SIGNAL_TRANSDUCTION             | POSITIVE_REGULATION_OF_SIGNAL_TRANSDUCTION             | Details ... | 65   | 0.4820055  | 2.2450554 | 0           | 0.0014391 | 0.006      |
| GROWTH_FACTOR_BINDING                                  | GROWTH_FACTOR_BINDING                                  | Details ... | 15   | 0.6105122  | 2.1058583 | 0.001106195 | 0.0091969 | 0.046      |
| RUFFLE                                                 | RUFFLE                                                 | Details ... | 17   | 0.5901742  | 2.0956807 | 0           | 0.0079833 | 0.048      |

Comment: An indicated p-value of "0" stands for p<0.0001

### Expression Module 2

| Pathway |                              |            |      |    |     |           |           |            |
|---------|------------------------------|------------|------|----|-----|-----------|-----------|------------|
| NAME    | GS<br> follow link to MSigDB | GS DETAILS | SIZE | ES | NES | NOM p-val | FDR q-val | FWER p-val |

|                                                                                                 |                                                                                                 |             |     |            |           |   |   |   |
|-------------------------------------------------------------------------------------------------|-------------------------------------------------------------------------------------------------|-------------|-----|------------|-----------|---|---|---|
| LEIN_NEURON_MARKERS                                                                             | LEIN_NEURON_MARKERS                                                                             | Details ... | 36  | 0.79355085 | 3.2301707 | 0 | 0 | 0 |
| VERHAAK_GLIOBLASTOMA_NEURAL                                                                     | VERHAAK_GLIOBLASTOMA_NEURAL                                                                     | Details ... | 76  | 0.6992351  | 3.1415334 | 0 | 0 | 0 |
| REACTOME_NEURONAL_SYSTEM                                                                        | REACTOME_NEURONAL_SYSTEM                                                                        | Details ... | 181 | 0.58458513 | 2.8434193 | 0 | 0 | 0 |
| VERHAAK_GLIOBLASTOMA_PRONEURAL                                                                  | VERHAAK_GLIOBLASTOMA_PRONEURAL                                                                  | Details ... | 90  | 0.6124937  | 2.8142054 | 0 | 0 | 0 |
| REACTOME_NEUROTRANSMITTER_RELEASE_CYCLE                                                         | REACTOME_NEUROTRANSMITTER_RELEASE_CYCLE                                                         | Details ... | 25  | 0.74820673 | 2.768792  | 0 | 0 | 0 |
| REACTOME_TRANSMISSION_ACROSS_CHEMICAL_SYNAPSES                                                  | REACTOME_TRANSMISSION_ACROSS_CHEMICAL_SYNAPSES                                                  | Details ... | 119 | 0.5836991  | 2.7493186 | 0 | 0 | 0 |
| LU_AGING_BRAIN_DN                                                                               | LU_AGING_BRAIN_DN                                                                               | Details ... | 83  | 0.59680474 | 2.7157464 | 0 | 0 | 0 |
| LEE_TARGETS_OF_PTCH1_AND_SUFU_DN                                                                | LEE_TARGETS_OF_PTCH1_AND_SUFU_DN                                                                | Details ... | 47  | 0.6485147  | 2.7125256 | 0 | 0 | 0 |
| REACTOME_POTASSIUM_CHANNELS                                                                     | REACTOME_POTASSIUM_CHANNELS                                                                     | Details ... | 75  | 0.586142   | 2.652736  | 0 | 0 | 0 |
| KIM_ALL_DISORDERS_CALB1_CORR_UP                                                                 | KIM_ALL_DISORDERS_CALB1_CORR_UP                                                                 | Details ... | 275 | 0.51495576 | 2.5858028 | 0 | 0 | 0 |
| REACTOME_VOLTAGE_GATED_POTASSIUM_CHANNELS                                                       | REACTOME_VOLTAGE_GATED_POTASSIUM_CHANNELS                                                       | Details ... | 33  | 0.6390277  | 2.5694869 | 0 | 0 | 0 |
| WANG_LSD1_TARGETS_DN                                                                            | WANG_LSD1_TARGETS_DN                                                                            | Details ... | 23  | 0.6803653  | 2.531583  | 0 | 0 | 0 |
| REACTOME_ION_CHANNEL_TRANSPORT                                                                  | REACTOME_ION_CHANNEL_TRANSPORT                                                                  | Details ... | 35  | 0.61844075 | 2.4863052 | 0 | 0 | 0 |
| REACTOME_NEUROTRANSMITTER_RECEPTOR_BINDING_AND_DOWNSTREAM_TRANSMISSION_IN_THE_POSTSYNAPTIC_CELL | REACTOME_NEUROTRANSMITTER_RECEPTOR_BINDING_AND_DOWNSTREAM_TRANSMISSION_IN_THE_POSTSYNAPTIC_CELL | Details ... | 86  | 0.53090507 | 2.4596374 | 0 | 0 | 0 |
| MCCLUNG_DELTA_FOSB_TARGETS_8WK                                                                  | MCCLUNG_DELTA_FOSB_TARGETS_8WK                                                                  | Details ... | 25  | 0.64918005 | 2.451265  | 0 | 0 | 0 |
| MCCLUNG_CREB1_TARGETS_UP                                                                        | MCCLUNG_CREB1_TARGETS_UP                                                                        | Details ... | 45  | 0.5760586  | 2.4475546 | 0 | 0 | 0 |
| LEIN_OLIGODENDROCYTE_MARKERS                                                                    | LEIN_OLIGODENDROCYTE_MARKERS                                                                    | Details ... | 32  | 0.60218614 | 2.432109  | 0 | 0 | 0 |
| REACTOME_POST_NMDA_RECEPTOR_ACTIVATION_EVENTS                                                   | REACTOME_POST_NMDA_RECEPTOR_ACTIVATION_EVENTS                                                   | Details ... | 22  | 0.6431489  | 2.3713114 | 0 | 0 | 0 |
| ASTON_MAJOR_DEPRESSIVE_DISORDER_DN                                                              | ASTON_MAJOR_DEPRESSIVE_DISORDER_DN                                                              | Details ... | 86  | 0.5089443  | 2.3656058 | 0 | 0 | 0 |

#### Ontology

| NAME                                         | GS<br> follow link to MSigDB                 | GS DETAILS  | SIZE | ES         | NES       | NOM p-val   | FDR q-val   | FWER p-val |
|----------------------------------------------|----------------------------------------------|-------------|------|------------|-----------|-------------|-------------|------------|
| VOLTAGE_GATED_CATION_CHANNEL_ACTIVITY        | VOLTAGE_GATED_CATION_CHANNEL_ACTIVITY        | Details ... | 43   | 0.59378016 | 2.4700959 | 0           | 0           | 0          |
| SYNAPTIC_TRANSMISSION                        | SYNAPTIC_TRANSMISSION                        | Details ... | 105  | 0.52101654 | 2.4363241 | 0           | 0           | 0          |
| POTASSIUM_ION_TRANSPORT                      | POTASSIUM_ION_TRANSPORT                      | Details ... | 44   | 0.5752327  | 2.4193408 | 0           | 0           | 0          |
| VOLTAGE_GATED_CHANNEL_ACTIVITY               | VOLTAGE_GATED_CHANNEL_ACTIVITY               | Details ... | 48   | 0.5620596  | 2.3980422 | 0           | 2.23E-04    | 0.001      |
| VOLTAGE_GATED_POTASSIUM_CHANNEL_COMPLEX      | VOLTAGE_GATED_POTASSIUM_CHANNEL_COMPLEX      | Details ... | 27   | 0.6246317  | 2.3750608 | 0           | 1.78E-04    | 0.001      |
| TRANSMISSION_OF_NERVE_IMPULSE                | TRANSMISSION_OF_NERVE_IMPULSE                | Details ... | 114  | 0.49893552 | 2.3531435 | 0           | 1.48E-04    | 0.001      |
| VOLTAGE_GATED_POTASSIUM_CHANNEL_ACTIVITY     | VOLTAGE_GATED_POTASSIUM_CHANNEL_ACTIVITY     | Details ... | 25   | 0.62578964 | 2.3481867 | 0           | 1.27E-04    | 0.001      |
| ION_CHANNEL_ACTIVITY                         | ION_CHANNEL_ACTIVITY                         | Details ... | 87   | 0.5044314  | 2.3469286 | 0           | 1.11E-04    | 0.001      |
| GATED_CHANNEL_ACTIVITY                       | GATED_CHANNEL_ACTIVITY                       | Details ... | 72   | 0.521216   | 2.3463588 | 0           | 9.89E-05    | 0.001      |
| POTASSIUM_CHANNEL_ACTIVITY                   | POTASSIUM_CHANNEL_ACTIVITY                   | Details ... | 36   | 0.5776478  | 2.3348494 | 0           | 8.91E-05    | 0.001      |
| METAL_ION_TRANSPORT                          | METAL_ION_TRANSPORT                          | Details ... | 75   | 0.5076481  | 2.3138921 | 0           | 8.10E-05    | 0.001      |
| MONOVALENT_INORGANIC_CATION_TRANSPORT        | MONOVALENT_INORGANIC_CATION_TRANSPORT        | Details ... | 62   | 0.5307589  | 2.3061347 | 0           | 7.42E-05    | 0.001      |
| CATION_CHANNEL_ACTIVITY                      | CATION_CHANNEL_ACTIVITY                      | Details ... | 71   | 0.5095651  | 2.2474594 | 0           | 6.85E-05    | 0.001      |
| METAL_ION_TRANSMEMBRANE_TRANSPORTER_ACTIVITY | METAL_ION_TRANSMEMBRANE_TRANSPORTER_ACTIVITY | Details ... | 87   | 0.486302   | 2.2306135 | 0           | 6.36E-05    | 0.001      |
| SUBSTRATE_SPECIFIC_CHANNEL_ACTIVITY          | SUBSTRATE_SPECIFIC_CHANNEL_ACTIVITY          | Details ... | 91   | 0.47928095 | 2.205262  | 0           | 1.19E-04    | 0.002      |
| CATION_TRANSPORT                             | CATION_TRANSPORT                             | Details ... | 96   | 0.46490255 | 2.1780188 | 0           | 2.23E-04    | 0.004      |
| REGULATION_OF_NEUROTRANSMITTER_LEVELS        | REGULATION_OF_NEUROTRANSMITTER_LEVELS        | Details ... | 15   | 0.64841914 | 2.1598208 | 0.001102536 | 5.25E-04    | 0.01       |
| NEUROTRANSMITTER_RECEPTOR_ACTIVITY           | NEUROTRANSMITTER_RECEPTOR_ACTIVITY           | Details ... | 29   | 0.5460957  | 2.1180286 | 0           | 8.41E-04    | 0.017      |
| ION_TRANSPORT                                | ION_TRANSPORT                                | Details ... | 117  | 0.44581825 | 2.1152372 | 0           | 9.37E-04    | 0.02       |
| NEUROTRANSMITTER_BINDING                     | NEUROTRANSMITTER_BINDING                     | Details ... | 31   | 0.5380597  | 2.1091177 | 0           | 0.001023261 | 0.023      |
| CATION_TRANSMEMBRANE_TRANSPORTER_ACTIVITY    | CATION_TRANSMEMBRANE_TRANSPORTER_ACTIVITY    | Details ... | 127  | 0.4344515  | 2.0866168 | 0           | 0.001610888 | 0.036      |

## Expression Module 3

#### Pathway

| NAME                           | GS<br> follow link to MSigDB   | GS DETAILS  | SIZE | ES         | NES       | NOM p-val | FDR q-val | FWER p-val |
|--------------------------------|--------------------------------|-------------|------|------------|-----------|-----------|-----------|------------|
| VERHAAK_GLIOBLASTOMA_PRONEURAL | VERHAAK_GLIOBLASTOMA_PRONEURAL | Details ... | 90   | 0.7009721  | 3.6541247 | 0         | 0         | 0          |
| VERHAAK_GLIOBLASTOMA_NEURAL    | VERHAAK_GLIOBLASTOMA_NEURAL    | Details ... | 76   | 0.5518531  | 2.7807393 | 0         | 0         | 0          |
| LEIN_NEURON_MARKERS            | LEIN_NEURON_MARKERS            | Details ... | 36   | 0.5819332  | 2.5886965 | 0         | 0         | 0          |
| REACTOME_NEURONAL_SYSTEM       | REACTOME_NEURONAL_SYSTEM       | Details ... | 181  | 0.45277166 | 2.5045533 | 0         | 0         | 0          |
| LU_AGING_BRAIN_DN              | LU_AGING_BRAIN_DN              | Details ... | 83   | 0.48975444 | 2.4855797 | 0         | 0         | 0          |



**Ontology**

| NAME                                  | GS<br> follow link to MSigDB          | GS DETAILS  | SIZE | ES         | NES       | NOM p-val | FDR q-val   | FWER p-val |
|---------------------------------------|---------------------------------------|-------------|------|------------|-----------|-----------|-------------|------------|
| SYNAPTIC_TRANSMISSION                 | SYNAPTIC_TRANSMISSION                 | Details ... | 105  | 0.43119714 | 2.2886755 | 0         | 0.006722231 | 0.007      |
| TRANSMISSION_OF_NERVE_IMPULSE         | TRANSMISSION OF NERVE IMPULSE         | Details ... | 114  | 0.4159442  | 2.2452185 | 0         | 0.007690805 | 0.016      |
| VOLTAGE_GATED_CATION_CHANNEL_ACTIVITY | VOLTAGE_GATED_CATION_CHANNEL_ACTIVITY | Details ... | 43   | 0.48607305 | 2.2200336 | 0         | 0.007685192 | 0.024      |
| VOLTAGE_GATED_CHANNEL_ACTIVITY        | VOLTAGE GATED CHANNEL ACTIVITY        | Details ... | 48   | 0.47953898 | 2.211258  | 0         | 0.005763894 | 0.024      |
